# Supplementary material for: Thoracic adaptations for ventilation during locomotion in humans and other mammals
Source: Oxford University Press journal article supplement (doi:10.1242/jeb.189357), 2019-01-01
Supplement: jeb189357supp.pdf [file jeb189357supp.pdf]

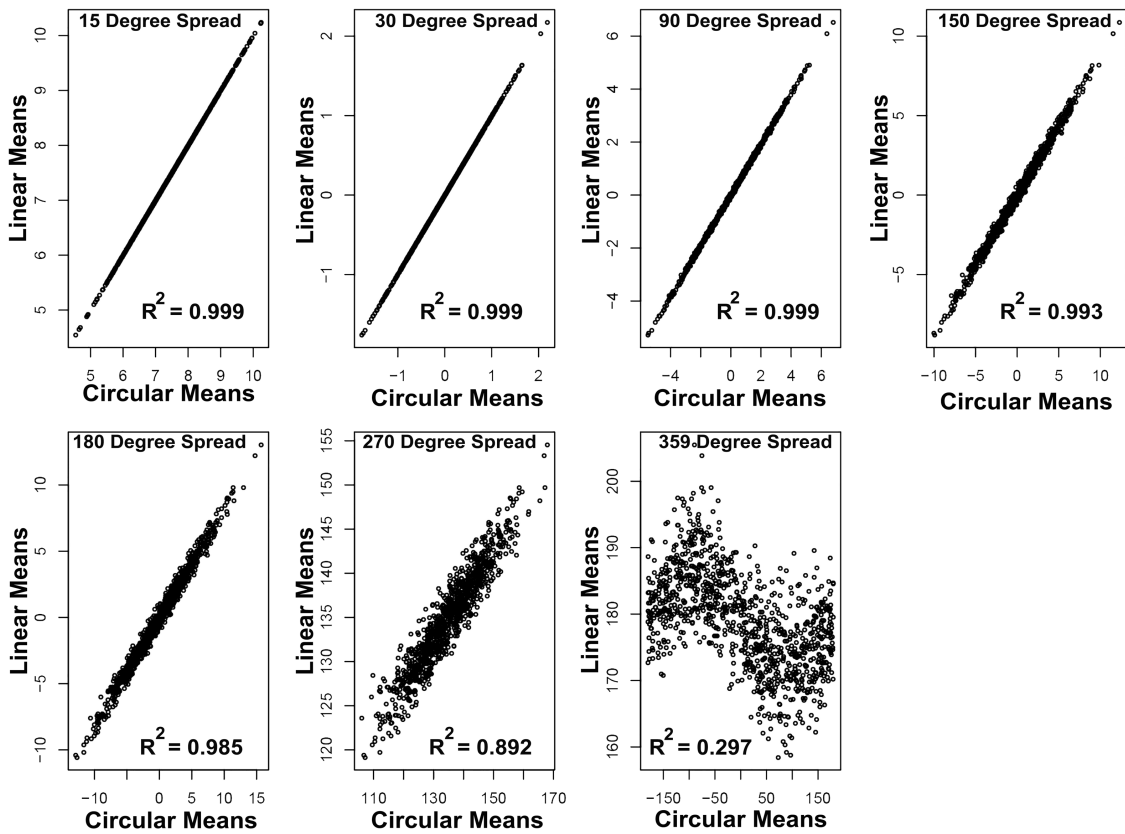

**Figure S1:** Circular means versus linear means from randomly generated angular data. Means calculated from 200 simulated angular data points across a desired angular spread were assessed in R (version 3.1.1) using linear and circular analyses. As spread of angular measurements increases, the ability to use linear analyses on circular data decreases ( $R^2$  decreases). However, with a 150-degree spread (approximating our collected included angle data), circular data behaves linearly ( $R^2=0.9931$ ), making linear analyses acceptable. Plots and analyses produced with the help of Steven Worthington at the Institute for Quantitative Social Science, Harvard University.

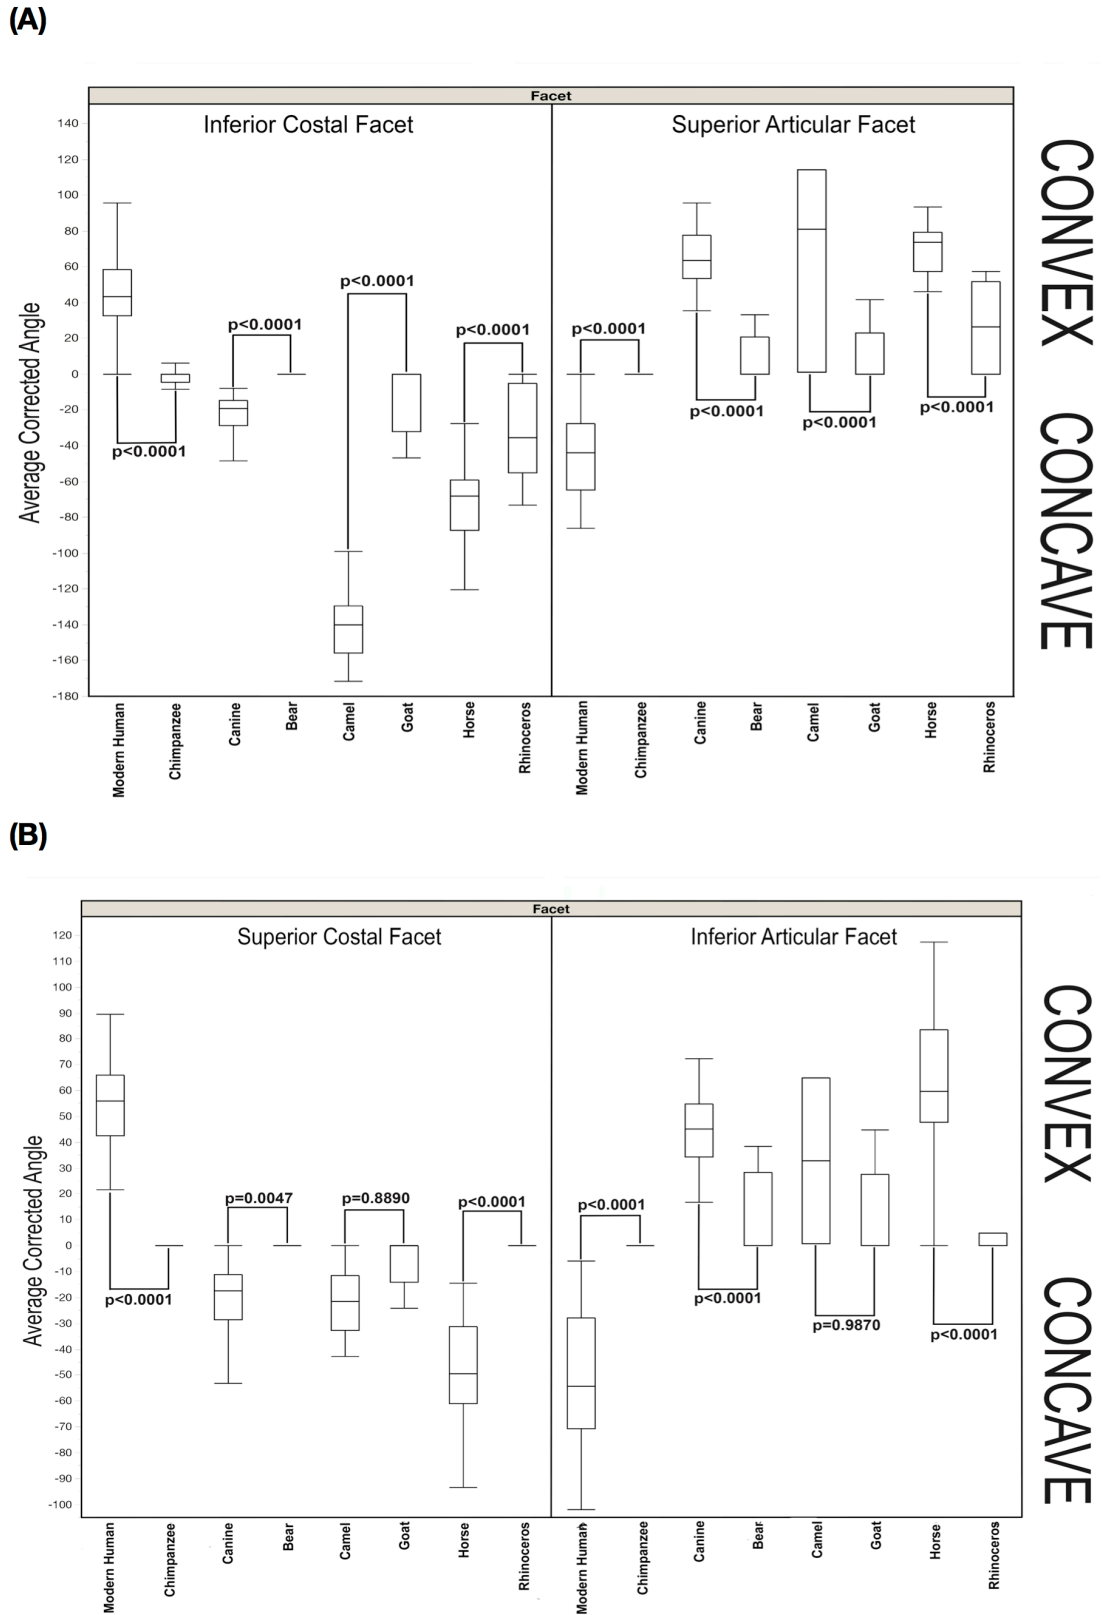

**Figure S2:** Differences in costovertebral joint morphology between closely related

endurance-adapted cursors and non-endurance extant species in the superior (A) and inferior (B) sites of articulation in costovertebral joint. Negative included angle values indicate convex joint facets, while positive values indicate concavity. Larger values are associated with greater joint curvature. Endurance-adapted cursorial species generally exhibited increased curvature relative to closely related non-cursorial species within the same Order.

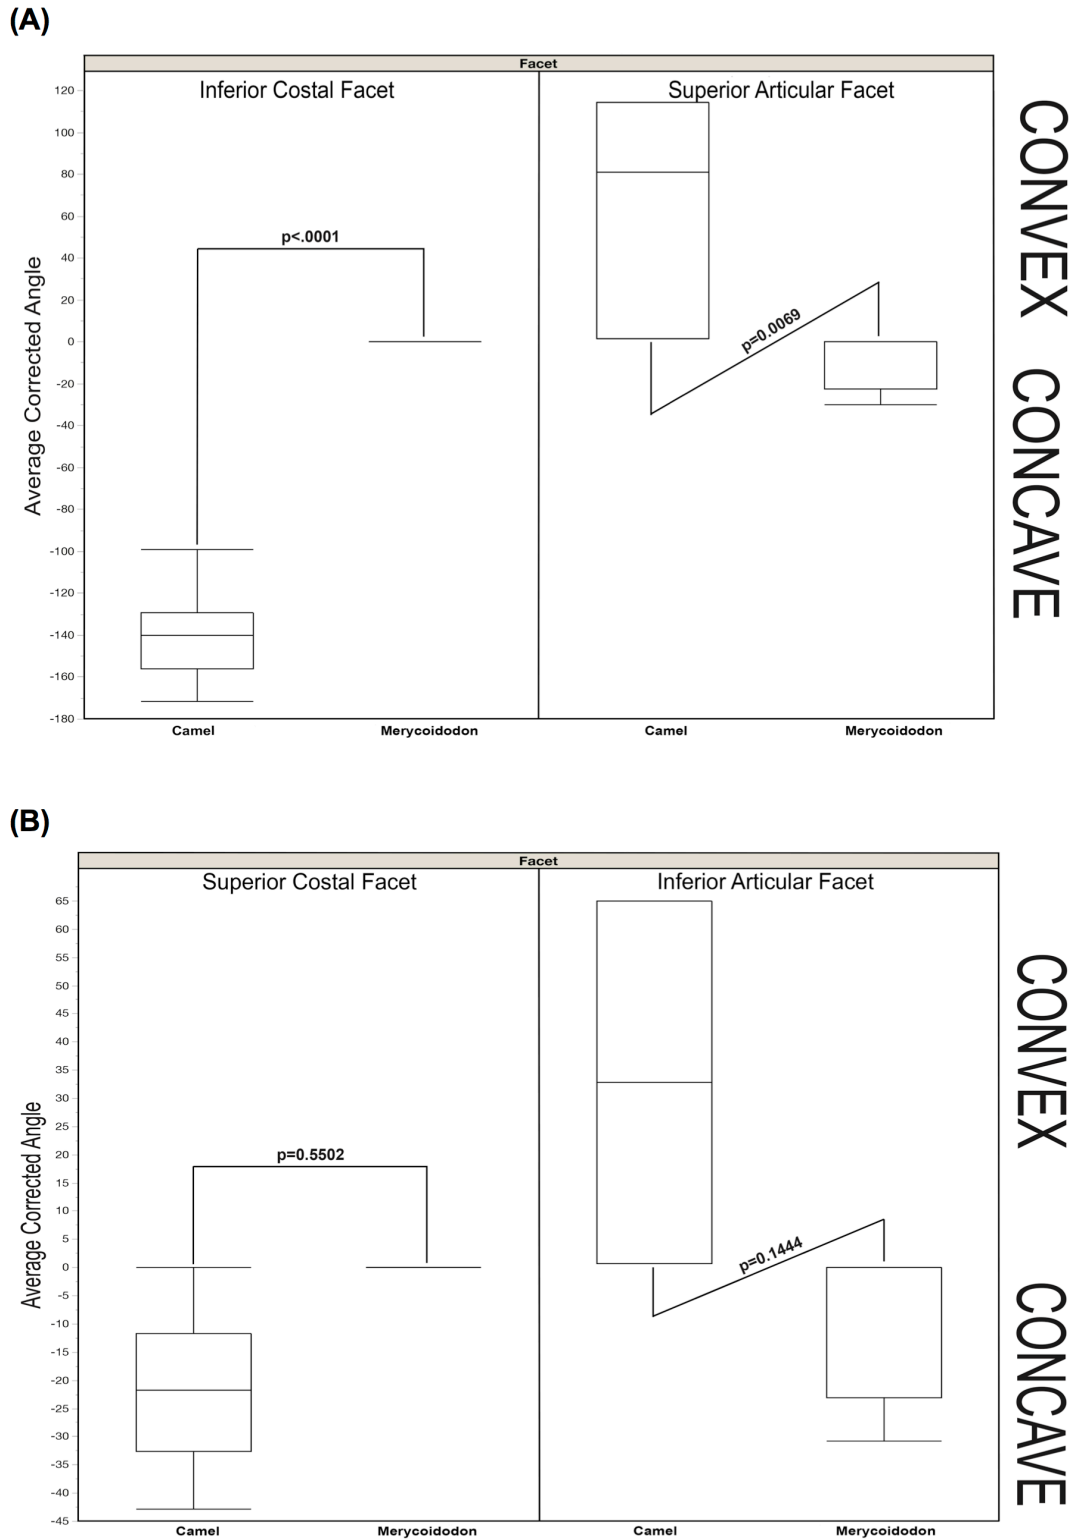

**Figure S3:** Differences in costovertebral joint morphology between extant camels and *Merycoidodon culbertsoni* in the superior (A) and inferior (B) sites of articulation in costovertebral joint. Negative included angel values indicate convex joint facets, while

positive values indicate concavity. Larger values are associated with greater joint curvature. Camels exhibited increased curvature in the upper site of articulation. As with camels and goats, camels differ from *Merycoïdodon* at the superior site of articulation of the costovertebral joint. The superior site of articulation in camels exhibits an almost ball-and-socket joint-architecture and appears to be the primary articulation point between the vertebrae and heads of the ribs. The inferior site of articulation of the costovertebral joint appears reduced, with the superior site of articulation being primarily responsible for rib movement.

**Table S1:** Measurements of heart rate (HR), tidal volume ( $V_T$ ) and respiration rate ( $f_R$ ) in humans, dogs and goats. Estimated  $HR_{MAX}$  values are calculated based on  $\dot{V}O_2$  and associated HR measurements (taken when the animals were trotting at the fastest speeds they would sustain) and previously measured  $\dot{V}O_{2MAX}$  values for dogs (Lucas et al., 1980) and for goats (Taylor et al., 1980) ( $HR_{MAX} = \frac{HR_{measured} \times \dot{V}O_{2MAX}}{\dot{V}O_{2measured}}$ ).

| Participant/<br>Subject<br>ID | Species             | Body<br>Mass<br>(kg) | $HR_{MAX}$<br>* indicates estimated<br>value calculated from<br>$\dot{V}O_2$ .<br><sup>R</sup> indicates values<br>reported elsewhere. | HR<br>(beat/min) | $V_T$<br>(L) | $f_R$<br>(breaths/min) |
|-------------------------------|---------------------|----------------------|----------------------------------------------------------------------------------------------------------------------------------------|------------------|--------------|------------------------|
| R1                            | <i>Homo sapiens</i> | 65.6                 | 182                                                                                                                                    | 49               | 1.362        | 23                     |
|                               |                     |                      |                                                                                                                                        | 76               | 1.223        | 22                     |
|                               |                     |                      |                                                                                                                                        | 111              | 2.087        | 29                     |
|                               |                     |                      |                                                                                                                                        | 140              | 2.811        | 33                     |
|                               |                     |                      |                                                                                                                                        | 179              | 3.691        | 37                     |
|                               |                     |                      |                                                                                                                                        | 182              | 3.447        | 37                     |
| R2                            | <i>Homo sapiens</i> | 69.6                 | 191                                                                                                                                    | 60               | 0.872        | 13                     |
|                               |                     |                      |                                                                                                                                        | 97               | 0.914        | 31                     |
|                               |                     |                      |                                                                                                                                        | 135              | 2.09         | 32                     |
|                               |                     |                      |                                                                                                                                        | 153              | 2.36         | 35                     |
|                               |                     |                      |                                                                                                                                        | 183              | 2.689        | 44                     |
|                               |                     |                      |                                                                                                                                        | 191              | 2.397        | 50                     |
| R3                            | <i>Homo sapiens</i> | 72.7                 | 188                                                                                                                                    | 66               | 1.152        | 21                     |
|                               |                     |                      |                                                                                                                                        | 87               | 1.291        | 24                     |
|                               |                     |                      |                                                                                                                                        | 120              | 2.472        | 34                     |
|                               |                     |                      |                                                                                                                                        | 154              | 2.473        | 45                     |
|                               |                     |                      |                                                                                                                                        | 178              | 2.449        | 56                     |
|                               |                     |                      |                                                                                                                                        | 178              | 2.055        | 51                     |
| R4                            | <i>Homo sapiens</i> | 65.3                 | 196                                                                                                                                    | 73               | 0.851        | 9                      |
|                               |                     |                      |                                                                                                                                        | 86               | 1.13         | 21                     |
|                               |                     |                      |                                                                                                                                        | 125              | 1.71         | 30                     |
|                               |                     |                      |                                                                                                                                        | 153              | 2.155        | 33                     |
|                               |                     |                      |                                                                                                                                        | 191              | 2.435        | 45                     |
|                               |                     |                      |                                                                                                                                        | 193              | 2.514        | 49                     |
| S1                            | <i>Homo sapiens</i> | 66.7                 | 194                                                                                                                                    | 72               | 1.969        | 16                     |
|                               |                     |                      |                                                                                                                                        | 96               | 1.906        | 19                     |
|                               |                     |                      |                                                                                                                                        | 141              | 2.156        | 30                     |
|                               |                     |                      |                                                                                                                                        | 154              | 2.21         | 37                     |
|                               |                     |                      |                                                                                                                                        | 190              | 2.013        | 62                     |
|                               |                     |                      |                                                                                                                                        | 196              | 1.619        | 42                     |

|           |                     |       |      |     |       |     |
|-----------|---------------------|-------|------|-----|-------|-----|
| <b>S2</b> | <i>Homo sapiens</i> | 77.1  | 188  | 64  | 0.909 | 12  |
|           |                     |       |      | 92  | 1.276 | 25  |
|           |                     |       |      | 113 | 1.624 | 47  |
|           |                     |       |      | 155 | 2.46  | 48  |
|           |                     |       |      | 185 | 2.754 | 53  |
| <b>S3</b> | <i>Homo sapiens</i> | 56.3  | 200  | 69  | 0.426 | 30  |
|           |                     |       |      | 86  | 0.717 | 24  |
|           |                     |       |      | 119 | 1.323 | 29  |
|           |                     |       |      | 195 | 2.32  | 39  |
|           |                     |       |      | 196 | 1.807 | 47  |
| <b>S4</b> | <i>Homo sapiens</i> | 70.9  | 186  | 69  | 1.236 | 12  |
|           |                     |       |      | 75  | 1.366 | 19  |
|           |                     |       |      | 115 | 1.814 | 24  |
|           |                     |       |      | 152 | 3.165 | 31  |
|           |                     |       |      | 180 | 2.582 | 61  |
| <b>S5</b> | <i>Homo sapiens</i> | 84.8  | 196  | 58  | 0.976 | 14  |
|           |                     |       |      | 94  | 2.166 | 17  |
|           |                     |       |      | 120 | 2.215 | 44  |
|           |                     |       |      | 152 | 2.58  | 36  |
|           |                     |       |      | 188 | 2.971 | 57  |
| <b>S6</b> | <i>Homo sapiens</i> | 78.6  | 184  | 61  | 0.583 | 23  |
|           |                     |       |      | 80  | 0.975 | 32  |
|           |                     |       |      | 113 | 2.398 | 30  |
|           |                     |       |      | 151 | 3.077 | 35  |
|           |                     |       |      | 178 | 3.58  | 46  |
| <b>G1</b> | <i>Capra hircus</i> | 40    | 258* | 139 | 0.824 | 89  |
|           |                     |       |      | 191 | 0.614 | 122 |
|           |                     |       |      | 205 | 0.591 | 147 |
|           |                     |       |      | 218 | 0.295 | 186 |
|           |                     |       |      | 230 | 0.287 | 189 |
| <b>G2</b> | <i>Capra hircus</i> | 27.69 | 236  | 131 | 0.724 | 69  |
|           |                     |       |      | 180 | 0.343 | 77  |
|           |                     |       |      | 218 | 0.318 | 89  |
|           |                     |       |      | 236 | 0.616 | 97  |
|           |                     |       |      | 236 | 0.616 | 97  |
| <b>G3</b> | <i>Capra hircus</i> | 41.9  | 239* | 111 | 0.502 | 63  |
|           |                     |       |      | 169 | 0.498 | 72  |

|           |                         |       |                                            |     |       |     |
|-----------|-------------------------|-------|--------------------------------------------|-----|-------|-----|
|           |                         |       |                                            | 183 | 0.56  | 81  |
|           |                         |       |                                            | 222 | 0.435 | 108 |
| <b>D1</b> | <i>Canis familiaris</i> | 35.7  | 313*                                       | 93  | 1.776 | 23  |
|           |                         |       | 294±5 <sup>R</sup><br>(Lucas et al., 1980) | 145 | 0.816 | 32  |
|           |                         |       |                                            | 155 | 0.663 | 36  |
|           |                         |       |                                            | 151 | 0.57  | 32  |
|           |                         |       |                                            | 147 | 0.434 | 77  |
| <b>D2</b> | <i>Canis familiaris</i> | 31.06 | 314*                                       | 62  | 1.472 | 23  |
|           |                         |       | 294±5 <sup>R</sup><br>(Lucas et al., 1980) | 116 | 0.556 | 38  |
|           |                         |       |                                            | 109 | 0.452 | 29  |
|           |                         |       |                                            | 109 | 0.437 | 29  |
|           |                         |       |                                            | 105 | 0.386 | 44  |
| <b>D3</b> | <i>Canis familiaris</i> | 25.96 | 312*                                       | 56  | 0.58  | 24  |
|           |                         |       | 294±5 <sup>R</sup><br>(Lucas et al., 1980) | 84  | 0.668 | 22  |
|           |                         |       |                                            | 96  | 0.699 | 22  |
|           |                         |       |                                            | 93  | 0.727 | 23  |
|           |                         |       |                                            | 93  | 0.547 | 24  |



**Table S2:** Repeatability of included angle measurements for the inferior costal facet (ICF), superior articular facet (SAF), superior costal facet (SCF) and inferior articular facet (IAF).

| <b>Species</b>                                                  | <b>Facet</b> | <b>% of Total Variation due to Repeated Measurement</b> | <b>Repeatability (Barrentine, 1991)</b> |
|-----------------------------------------------------------------|--------------|---------------------------------------------------------|-----------------------------------------|
| <i>Homo sapiens</i>                                             | SAF          | <1                                                      | Excellent                               |
|                                                                 | IAF          | <1                                                      | Excellent                               |
|                                                                 | SCF          | <1                                                      | Excellent                               |
|                                                                 | ICF          | <1                                                      | Excellent                               |
| <i>Pan troglodytes</i>                                          | SAF          | <1                                                      | Excellent                               |
|                                                                 | IAF          | <1                                                      | Excellent                               |
|                                                                 | SCF          | <1                                                      | Excellent                               |
|                                                                 | ICF          | <1                                                      | Excellent                               |
| <i>Equus caballus</i>                                           | SAF          | <1                                                      | Excellent                               |
|                                                                 | IAF          | <1                                                      | Excellent                               |
|                                                                 | SCF          | <1                                                      | Excellent                               |
|                                                                 | ICF          | <1                                                      | Excellent                               |
| <i>Rhinoceros unicornis</i> and <i>Dicerorhinus sumatrensis</i> | SAF          | <1                                                      | Excellent                               |
|                                                                 | IAF          | <1                                                      | Excellent                               |
|                                                                 | SCF          | <1                                                      | Excellent                               |
|                                                                 | ICF          | <1                                                      | Excellent                               |
| <i>Canus familiaris</i> and <i>Canus lupus</i>                  | SAF          | <1                                                      | Excellent                               |
|                                                                 | IAF          | <1                                                      | Excellent                               |
|                                                                 | SCF          | <1                                                      | Excellent                               |
|                                                                 | ICF          | <1                                                      | Excellent                               |
| <i>Ursus americanus</i>                                         | SAF          | <1                                                      | Excellent                               |
|                                                                 | IAF          | <1                                                      | Excellent                               |
|                                                                 | SCF          | <1                                                      | Excellent                               |
|                                                                 | ICF          | <1                                                      | Excellent                               |
| <i>Camelus dromedarius</i>                                      | SAF          | <1                                                      | Excellent                               |
|                                                                 | IAF          | <1                                                      | Excellent                               |
|                                                                 | SCF          | <1                                                      | Excellent                               |
|                                                                 | ICF          | <1                                                      | Excellent                               |
| <i>Capra hircus</i>                                             | SAF          | <1                                                      | Excellent                               |
|                                                                 | IAF          | <1                                                      | Excellent                               |
|                                                                 | SCF          | <1                                                      | Excellent                               |
|                                                                 | ICF          | <1                                                      | Excellent                               |
| <i>H. neanderthalensis</i>                                      | SAF          | <1                                                      | Excellent                               |
|                                                                 | IAF          | <1                                                      | Excellent                               |
|                                                                 | SCF          | <1                                                      | Excellent                               |
|                                                                 | ICF          | <1                                                      | Excellent                               |
| <i>H. erectus</i>                                               | SAF          | <1                                                      | Excellent                               |
|                                                                 | IAF          | <1                                                      | Excellent                               |
|                                                                 | SCF          | <1                                                      | Excellent                               |
|                                                                 | ICF          | <1                                                      | Excellent                               |
| <i>Au. sediba</i>                                               | SAF          | <1                                                      | Excellent                               |
|                                                                 | IAF          | <1                                                      | Excellent                               |
|                                                                 | SCF          | <1                                                      | Excellent                               |
|                                                                 | ICF          | <1                                                      | Excellent                               |

|                                       |     |    |           |
|---------------------------------------|-----|----|-----------|
| <b><i>Au. afarensis</i></b>           | SAF |    |           |
|                                       | IAF |    |           |
|                                       | SCF | <1 | Excellent |
|                                       | ICF | <1 | Excellent |
| <b><i>Merycoiodon culbertsoni</i></b> | SAF | <1 | Excellent |
|                                       | IAF | <1 | Excellent |
|                                       | SCF | <1 | Excellent |
|                                       | ICF | <1 | Excellent |

**Table S3:** Measured inferior costal facet (ICF), superior articular facet (SAF), superior costal facet (SCF) and inferior articular facet (IAF) included angles across sampled species. Negative included angle values indicate concave joint facets, while positive values indicate convexity. Larger values are associated with greater joint concavo-convexity. Angle values of 0 indicate a flat facet.

| <b>Species</b>                                                                 | <b>Facet</b> | <b>Number of samples</b> | <b>Mean Angle (degrees)</b> | <b>Std. Error</b> |
|--------------------------------------------------------------------------------|--------------|--------------------------|-----------------------------|-------------------|
| <b><i>Homo sapiens</i></b>                                                     | SAF          | 47                       | -46.29                      | 2.75              |
|                                                                                | IAF          | 52                       | -50.56                      | 2.62              |
|                                                                                | SCF          | 56                       | 54.67                       | 1.58              |
|                                                                                | ICF          | 70                       | 46.24                       | 1.87              |
| <b><i>Pan troglodytes</i></b>                                                  | SAF          | 54                       | 0.41                        | 2.55              |
|                                                                                | IAF          | 54                       | 3.69                        | 13.35             |
|                                                                                | SCF          | 56                       | -1.04                       | 4.82              |
|                                                                                | ICF          | 70                       | -3.35                       | 1.87              |
| <b><i>Equus caballus</i></b>                                                   | SAF          | 24                       | 71.36                       | 3.83              |
|                                                                                | IAF          | 24                       | 61.40                       | 3.94              |
|                                                                                | SCF          | 24                       | -47.52                      | 2.41              |
|                                                                                | ICF          | 30                       | -73.03                      | 2.86              |
| <b><i>Rhinoceros unicornis</i><br/>and<br/><i>Dicerorhinus sumatrensis</i></b> | SAF          | 15                       | 29.44                       | 4.85              |
|                                                                                | IAF          | 14                       | 4.51                        | 5.04              |
|                                                                                | SCF          | 16                       | 0.00                        | 2.95              |
|                                                                                | ICF          | 20                       | -27.37                      | 3.92              |
| <b><i>Canus familiaris</i> and<br/><i>Canus lupus</i></b>                      | SAF          | 28                       | 64.79                       | 3.55              |
|                                                                                | IAF          | 28                       | 45.20                       | 3.57              |
|                                                                                | SCF          | 32                       | -19.73                      | 2.09              |
|                                                                                | ICF          | 40                       | -23.35                      | 2.48              |
| <b><i>Ursus americanus</i></b>                                                 | SAF          | 23                       | 9.19                        | 3.91              |
|                                                                                | IAF          | 23                       | 11.70                       | 3.94              |
|                                                                                | SCF          | 24                       | 0.00                        | 2.41              |

|                                       |     |    |         |       |
|---------------------------------------|-----|----|---------|-------|
|                                       | ICF | 30 | -2.15   | 2.86  |
| <b><i>Camelus dromedarius</i></b>     | SAF | 3  | 65.56   | 10.84 |
|                                       | IAF | 2  | 32.84   | 13.35 |
|                                       | SCF | 16 | -15.95  | 3.41  |
|                                       | ICF | 20 | -140.29 | 3.50  |
| <b><i>Capra hircus</i></b>            | SAF | 14 | 10.61   | 5.02  |
|                                       | IAF | 14 | 11.24   | 5.04  |
|                                       | SCF | 24 | -6.53   | 2.41  |
|                                       | ICF | 30 | -10.80  | 2.86  |
| <b><i>H. neanderthalensis</i></b>     | SAF | 3  | -17.11  | 10.84 |
|                                       | IAF | 5  | -28.02  | 8.44  |
|                                       | SCF | 7  | 41.34   | 4.47  |
|                                       | ICF | 8  | 32.94   | 5.54  |
| <b><i>H. erectus</i></b>              | SAF |    |         |       |
|                                       | IAF | 2  | -47.06  | 13.35 |
|                                       | SCF | 6  | 47.78   | 4.82  |
|                                       | ICF | 7  | 48.26   | 5.92  |
| <b><i>Au. sediba</i></b>              | SAF | 3  | -3.82   | 10.84 |
|                                       | IAF | 3  | 3.95    | 10.90 |
|                                       | SCF | 9  | 0.00    | 3.94  |
|                                       | ICF | 14 | 0.67    | 4.19  |
| <b><i>Au. afarensis</i></b>           | SAF |    |         |       |
|                                       | IAF |    |         |       |
|                                       | SCF | 2  | 0.00    | 8.35  |
|                                       | ICF | 2  | 0.00    | 11.08 |
| <b><i>Merycoiodon culbertsoni</i></b> | SAF | 4  | -7.47   | 9.38  |
|                                       | IAF | 4  | -7.67   | 9.44  |

|  |     |    |      |      |
|--|-----|----|------|------|
|  | SCF | 13 | 2.06 | 3.28 |
|  | ICF | 14 | 0.00 | 4.19 |

#### References:

**Barrentine, L.B.** (1991). *Concepts for R&R Studies*. Milwaukee, WI: ASQ Quality Press.

**Hohimer, A.R., Bissonnette, J.M., Metcalfe, J., McKean, T.A.** (1984). Effect of exercise on uterine blood flow in the pregnant Pygmy goat. *American Journal of Physiology*, **246**(2 Pt 2), H207-12.

**Lucas A., Therminarias, A., Tanche, M.** (1980). Maximum oxygen consumption in dogs during muscular exercise and cold exposure. *Pflügers Archiv European Journal of Physiology* **388**, 83-87.
